# Supplementary material
Source: publisher figshare collection journal article supplement (https://karger.figshare.com/ndownloader/files/22294119)
Supplement: Supplementary file 1 [file 22294119]

**Supplemental Table 1:** Cox regression analysis of factors associated with recurrence-free survival after distal pancreatectomy for pNET in complete cases

|  | | Bivariate | | Multivariable | |
| --- | --- | --- | --- | --- | --- |
| Variable | | HR (95% CI) | P | HR (95% CI) | P |
| Age > 65 | 1.12 (0.69-1.82) | | 0.64 |  |  |
| Sex (male) |  | |  |  |  |
| Female | *Ref* | |  |  |  |
| Male | 1.03 (0.70-1.52) | | 0.87 |  |  |
| Race |  | |  |  |  |
| Non-white | *Ref* | |  |  |  |
| White | 1.71 (0.89-3.29) | | 0.11 |  |  |
| Symptomatic |  | |  |  |  |
| No | *Ref* | |  |  |  |
| Yes | 1.78 (1.20-2.63) | | 0.004 |  |  |
| Primary location |  | |  |  |  |
| Body | *Ref* | |  |  |  |
| Tail | 1.03 (0.68-1.58) | | 0.88 |  |  |
| Tumor size |  | |  |  | <0.001 |
| ≤ 2cm | *Ref* | |  | *Ref* |  |
| > 2cm | 4.36 (2.65-7.17) | | <0.001 | 2.95 (1.58-5.49) |  |
| Multiple tumor | 1.28 (0.67-2.46) | | 0.46 |  |  |
| Tumor differentiation |  | |  |  |  |
| Well | *Ref* | |  |  |  |
| Mod to Poor | 1.64 (0.93-2.90) | | 0.088 |  |  |
| Ki-67 |  | |  |  | 0.045 |
| <3% | *Ref* | |  | *Ref* |  |
| ≥3% | 3.27 (1.94-5.51) | | <0.001 | 1.64 (1.01-2.67) |  |
| LNM | 3.05 (2.07-4.48) | | <0.001 |  |  |
| Margin status |  | |  |  |  |
| R0 | *Ref* | |  |  |  |
| R1 | 1.82 (1.15-2.89) | | 0.011 |  |  |
| Lymph-vascular invasion | 4.12 (2.63-6.44) | | <0.001 | 2.30 (1.38-3.82) | 0.001 |
| Perineural invasion | 1.48 (0.86-2.56) | | 0.16 |  |  |

HR: hazard ratio; LNM: lymph node metastasis
